# Supplementary material for: Can a single pyridinedicarboxylic acid be ample enough to nucleate supramolecular double helices in enantiomeric pseudopeptides?
Source: Royal Society of Chemistry journal article supplement (doi:10.1039/c3ce26912d), 2013-01-01
Supplement: c3ce26912d.pdf [file c3ce26912d.pdf]

# ***Can a single pyridinedicarboxylic acid ample enough to nucleate supramolecular double helices in enantiomeric pseudopeptides?***

**Anita Dutt Konar\***

*Department of Chemical Sciences, Indian Institute of Science Education and Research, Bhopal,  
ITI Gas Rahat Building, Govindpura, Bhopal – 462023*

*Email s: anita@iiserb.ac.in*

## **Table of Contents**

---

| <b>Category</b>                                                      | <b>Page no.</b> |
|----------------------------------------------------------------------|-----------------|
| <sup>1</sup> H & <sup>13</sup> C spectra of pseudopeptides <b>I</b>  | 2               |
| <sup>1</sup> H & <sup>13</sup> C spectra of pseudopeptides <b>II</b> | 3               |
| Mass spectra of pseudopeptides <b>I &amp; II</b>                     | 4               |

---

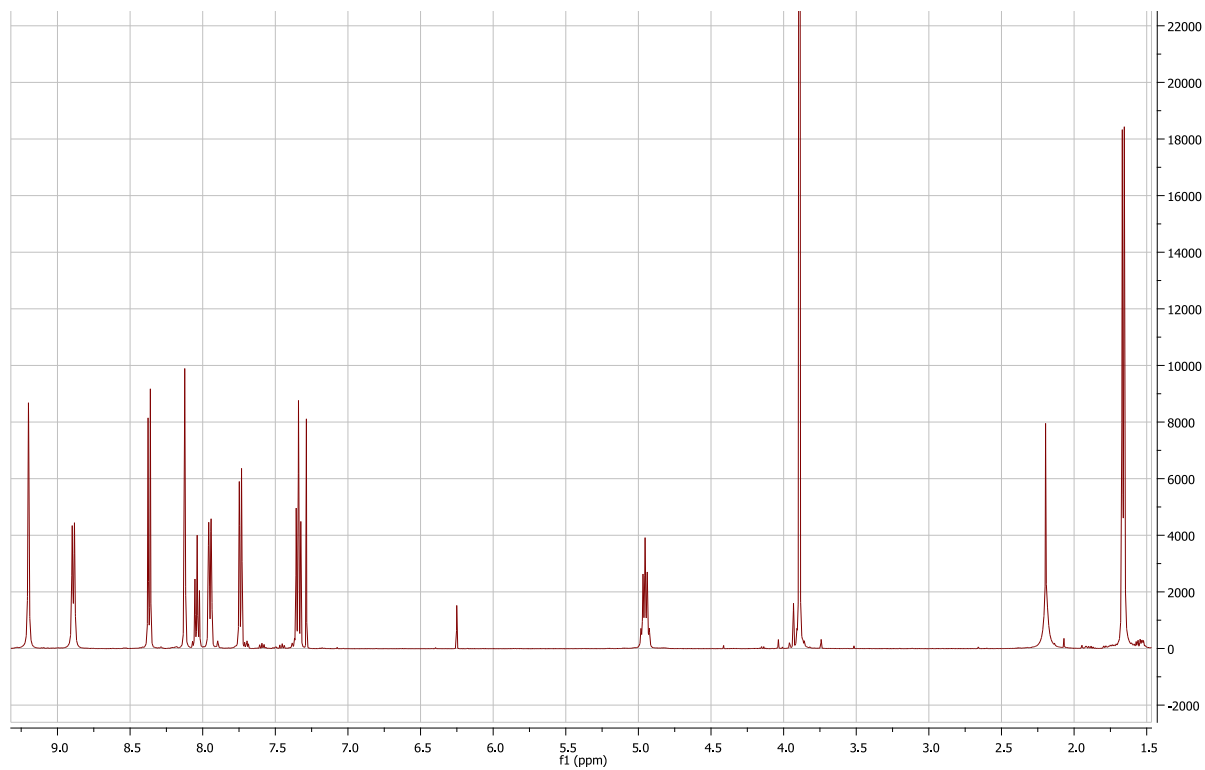

**Fig 1.**  $^1\text{H}$  NMR spectra of Pseudopeptide I

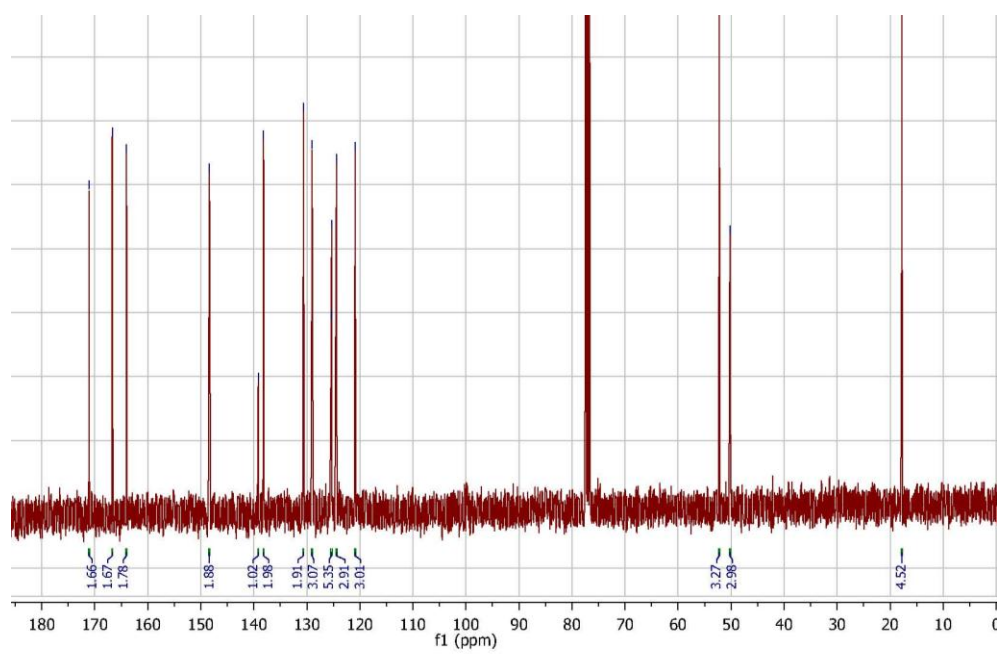

**Fig 2.**  $^{13}\text{C}$  NMR spectra of pseudopeptide I

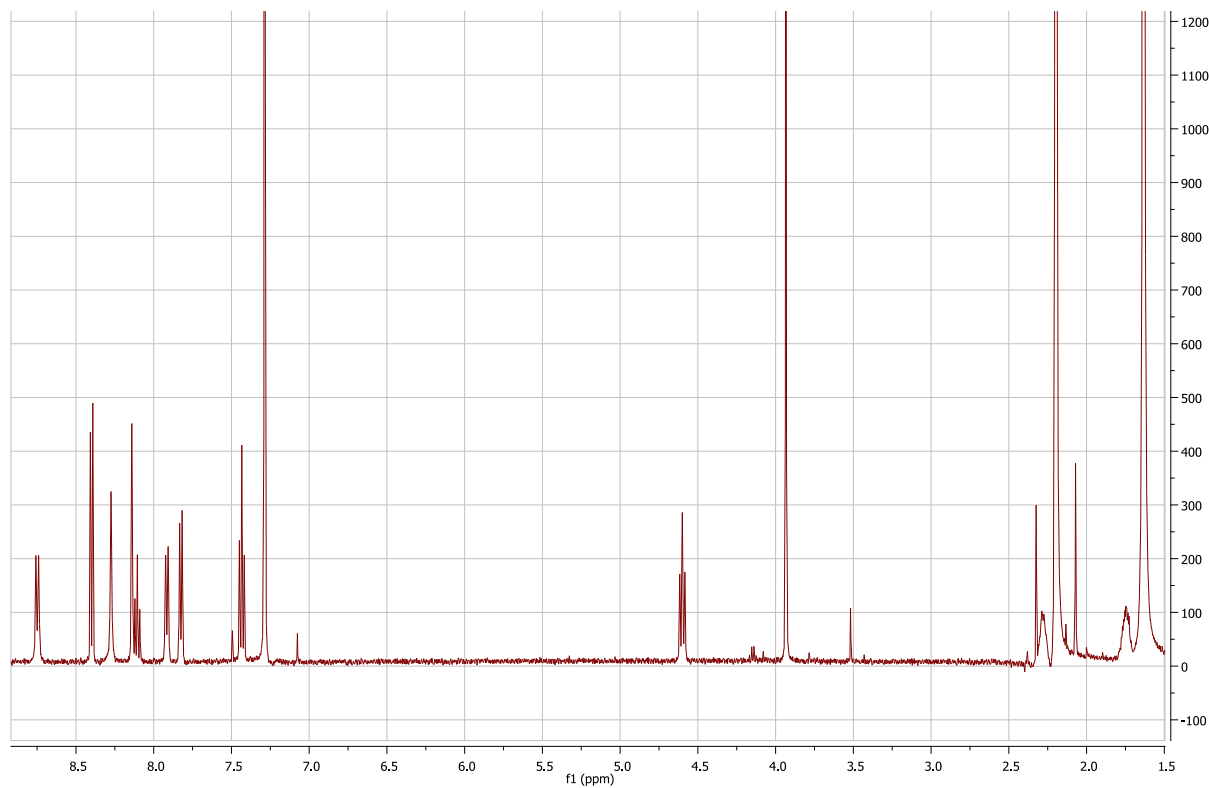

**Fig 3.**  $^1\text{H}$  NMR spectra of pseudopeptide II

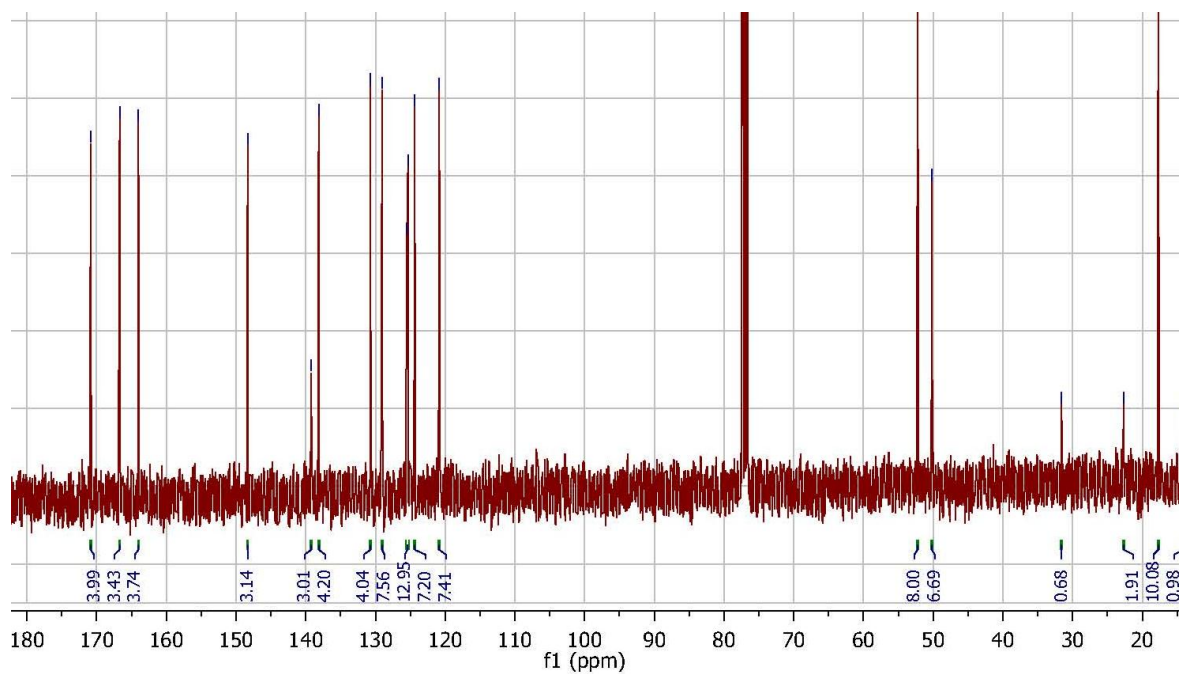

**Fig 4.**  $^{13}\text{C}$  NMR spectra of pseudopeptide II

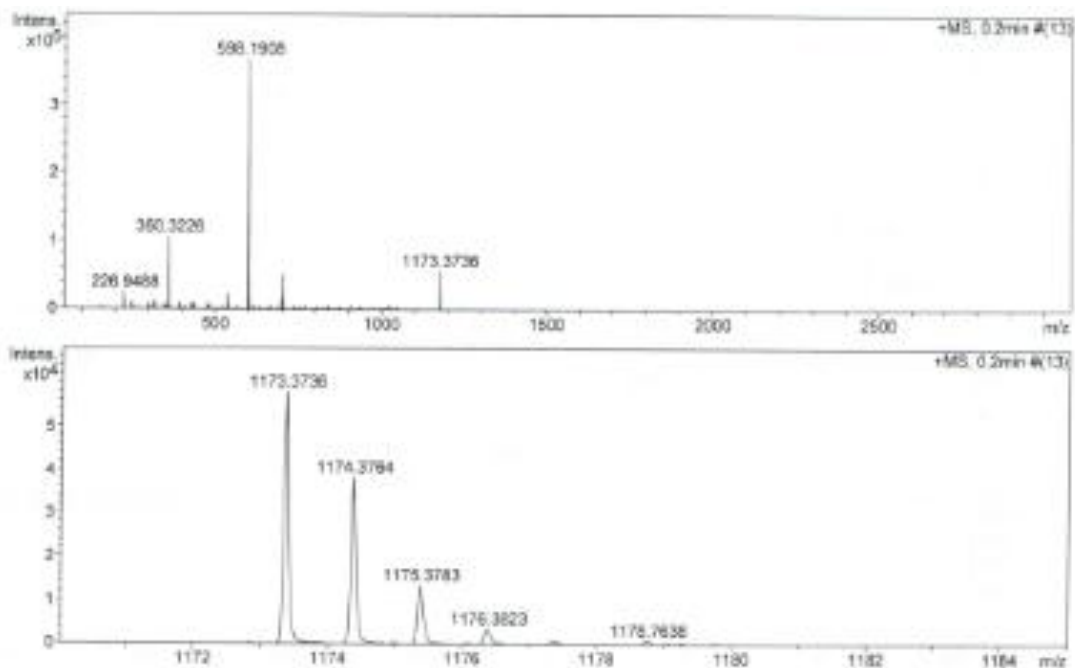

**Fig 5.** Mass spectra of pseudopeptide I

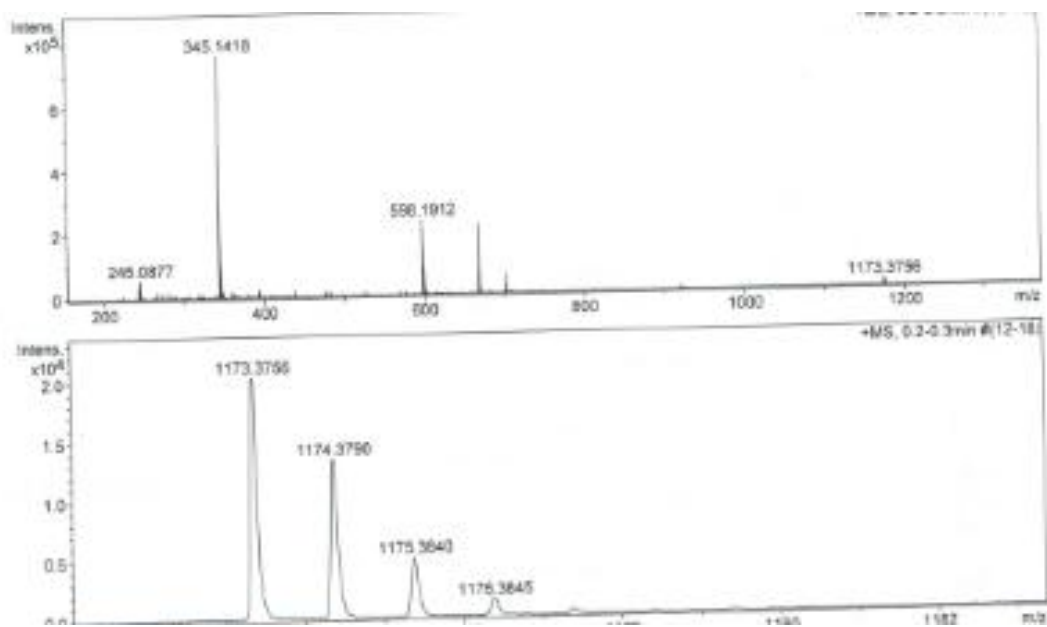

**Fig 6.** Mass spectra of pseudopeptide II
